# Supplementary material for: Pt/MnO2nanosheets: facile synthesis and highly efficient catalyst for ethylene oxidation at low temperature
Source: Royal Society of Chemistry journal article supplement (doi:10.1039/c6ra26529d), 2017-01-01
Supplement: c6ra26529d1.pdf [file c6ra26529d1.pdf]

## **Pt/MnO<sub>2</sub> nanosheets: facile synthesis and highly efficient catalyst for ethylene oxidation at low temperature**

*Min Wang,<sup>a,b</sup> Lingxia Zhang,<sup>\*a</sup> Weimin Huang,<sup>a</sup> Yajun Zhou,<sup>a,b</sup> Han Zhao,<sup>a,b</sup> Jian Lv,<sup>a,b</sup> Jianjian Tian<sup>a,c</sup>, Xiaotian Kan,<sup>a,b</sup> Jianlin Shi<sup>\*a</sup>*

<sup>a</sup> State Key Laboratory of High Performance Ceramics and Superfine Microstructure, Shanghai Institute of Ceramics, Chinese Academy of Sciences, 1295 Dingxi Road, Shanghai 200050, P. R. China

<sup>b</sup> University of Chinese Academy of Sciences, 19 Yuquan Road, Beijing 100049, P. R. China

<sup>c</sup> School of Materials Science and Engineering, Shanghai University, 99 Shangda Road, Shanghai 200444, P.R. China

Corresponding author. Tel.: +86 21 52412712; Fax: +86 21 52413122.

E-mail address: jlshi@mail.sic.ac.cn (J.L.Shi).

Corresponding author. Tel.: +86 21 52412706; Fax: +86 21 52413122.

E-mail address: zhlingxia@mail.sic.ac.cn (L.X.Zhang).

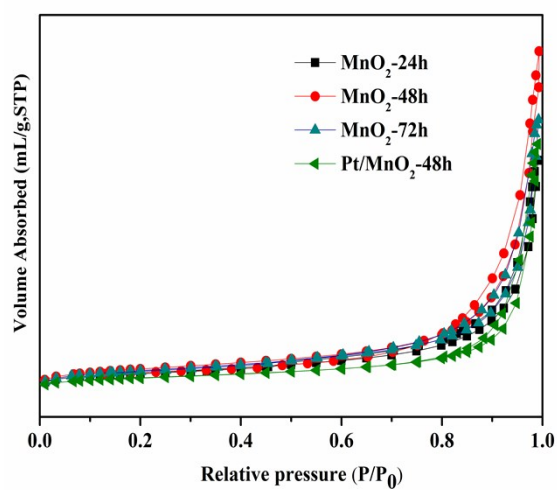

Fig S1. The N<sub>2</sub> adsorption–desorption isotherms of the as-synthesized MnO<sub>2</sub> samples and Pt/MnO<sub>2</sub>-48h.

Table S1. Specific surface areas of the as-prepared MnO<sub>2</sub> samples and Pt/MnO<sub>2</sub>-48h.

| Samples                                                 | MnO <sub>2</sub> -24h | MnO <sub>2</sub> -48h | MnO <sub>2</sub> -72h | Pt/MnO <sub>2</sub> -48h |
|---------------------------------------------------------|-----------------------|-----------------------|-----------------------|--------------------------|
| S <sub>BET</sub> (m <sup>2</sup> .<br>g <sup>-1</sup> ) | 157.5                 | 189.1                 | 175.9                 | 117.9                    |

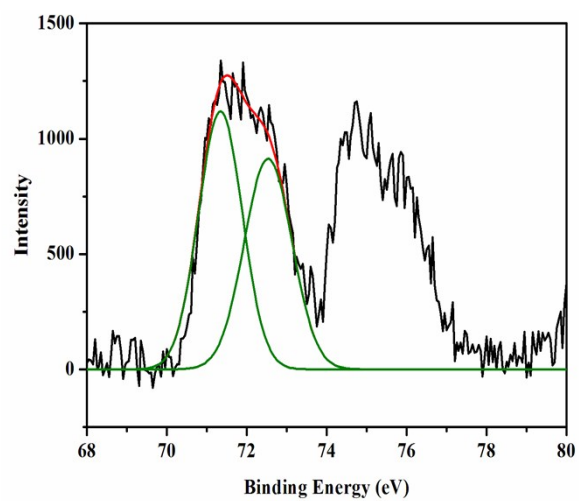

Fig S2. XPS Pt 4f spectrum of Pt/MnO<sub>2</sub>-48h.
